# Supplementary material
Source: PubMed Central journal article supplement (PMC7042998)
Supplement: baADV2019001026-suppl1.pdf [file baADV2019001026-suppl1.pdf]

## SUPPLEMENTARY MATERIALS

**Supplementary Table S1. Patient demographics and disease characteristics**

| <b>Patient characteristics</b>                              | <b>Patients With<br/>CR and PR<br/>(n=57)<br/>Baseline</b> | <b>Patients With<br/>CR and PR<br/>(n=31)<br/>12 Month</b> | <b>Patients With<br/>CR and PR<br/>(n=22)<br/>18 Month</b> |
|-------------------------------------------------------------|------------------------------------------------------------|------------------------------------------------------------|------------------------------------------------------------|
| Age, median (range), years                                  | 58 (26-76)                                                 | 60 (44-74)                                                 | 58 (45-71)                                                 |
| ≥65 years, %                                                | 28                                                         | 29                                                         | 23                                                         |
| ECOG performance status 0/1, %                              | 58/42                                                      | 55/45                                                      | 46/54                                                      |
| Central histology review                                    |                                                            |                                                            |                                                            |
| Diffuse large B-cell lymphoma, %                            | 74                                                         | 65                                                         | 64                                                         |
| Transformed follicular lymphoma, %                          | 25                                                         | 35                                                         | 36                                                         |
| Double/triple hits in <i>c-MYC/BCL2/BCL6</i> genes, %       | 14*                                                        | 6.4                                                        | 4.5                                                        |
| Cell of origin:† germinal/nongerminal center B-cell type, % | 51/44                                                      | 52/42                                                      | 55/36                                                      |
| 2/3/4-6 prior lines of antineoplastic therapy, %            | 40/35/18                                                   | 42/32/16                                                   | 41/32/14                                                   |
| IPI ≥2 at study entry, %                                    | 68                                                         | 65                                                         | 64                                                         |
| Refractory/relapsed to last therapy, %                      | 46/54                                                      | 52/48                                                      | 41/59                                                      |
| Prior ASCT, %                                               | 54                                                         | 48                                                         | 46                                                         |

ASCT, autologous stem cell transplant; CR, complete response; ECOG, Eastern Cooperative Oncology Group; IPI, International Prognostic index; PR, partial response.

\**c-MYC + BCL2*, n = 7; *c-MYC + BCL2 + BCL6*, n = 1; *c-MYC + BCL6*, n = 4.

†Determined by the Choi algorithm.

**Supplementary Table S2. FACT assessment scores (median) for responders**

|              |          | Baseline, median (SD)  |                              |                       | Change from BL Month 3, median (SD) | Change from BL Month 6, median (SD) | Change from BL Month 12, median (SD) | Change from BL Month 18, median (SD) |
|--------------|----------|------------------------|------------------------------|-----------------------|-------------------------------------|-------------------------------------|--------------------------------------|--------------------------------------|
| FACT-Lym     | MCID     | All patients (N = 108) | Patients With CR/PR (n = 57) | Non-responders (n=51) | Patients With CR/PR (n = 39)        | Patients With CR/PR (n = 34)        | Patients With CR/PR (n = 30)         | Patients with CR/PR (n = 21)         |
| FACT-G TS    | 3-7      | 78.8 (16.1)            | 80.0 (15.2)                  | 71.0 (17.0)           | +5.0 (11.9)*                        | +4.5 (13.9)*                        | +7.6 (12.2)*                         | +10.0 (11.1)†                        |
| FACT-Lym S   | 2.9-5.4  | 44.5 (9.1)             | 47.0 (9.3)                   | 42.0 (9.0)            | +3.0 (7.4)*                         | +3.0 (7.7)*                         | +2.5 (6.5)                           | +3.0 (6.6)*                          |
| FACT-Lym TOI | 5.5-11   | 83.0 (19.0)            | 87.5 (18.3)                  | 74.0 (19.5)           | +4.0 (14.5)                         | +7.0 (15.5)*                        | +6.0 (15.6)*                         | +6.0 (13.6)*                         |
| FACT-Lym TS  | 6.5-11.2 | 122.0 (24.0)           | 126.5 (22.8)                 | 108.3 (25.1)          | +7.0 (17.0)*                        | +8.3 (20.3)*                        | +9.2 (17.9)*                         | +12.0 (16.1)†                        |

+Indicates the means reported are positive changes from baseline.<sup>1-4</sup>

BL, baseline; CR, complete response; FACT-G TS, FACT-General Total Score; FACT-Lym, Functional Assessment of Cancer Therapy-Lymphoma; FACT-Lym S, FACT-Lymphoma Score; FACT-Lym TOI, FACT-Lymphoma Trial Outcome Index; FACT-Lym TS, FACT-Lymphoma Total Score; MCID, minimal clinically important difference; PR, partial response; SD, standard deviation.

\*Indicates that the clinical meaningful improvement in HRQoL is greater than MCID lower limit.

†Indicates that clinical meaningful improvement in HRQoL is greater than MCID upper limit.

**Supplementary Table S3. FACT-Lym assessment scores for all patients**

|              |          | Baseline, mean (SD)       | Change from BL<br>Month 3,<br>mean (SD) | Change from BL<br>Month 6,<br>mean (SD) | Change from BL<br>Month 12,<br>mean (SD) | Change from BL<br>Month 18,<br>mean (SD) |
|--------------|----------|---------------------------|-----------------------------------------|-----------------------------------------|------------------------------------------|------------------------------------------|
| FACT-Lym     | MCID     | All patients<br>(N = 108) | All patients<br>(n = 47)                | All patients<br>(n = 34) <sup>‡</sup>   | All patients<br>(n = 30) <sup>‡</sup>    | All patients<br>(n = 21) <sup>‡</sup>    |
| FACT-G TS    | 3-7      | 77.0 (16.1)               | +4.3 (12.5)*                            | +5.8 (13.9)*                            | +6.3 (12.2)*                             | +10.0 (11.1) <sup>†</sup>                |
| FACT-Lym S   | 2.9-5.4  | 44.4 (9.1)                | +1.9 (8.6)                              | +3.0 (7.7)*                             | +3.7 (6.5)*                              | +3.1 (6.6)*                              |
| FACT-Lym TOI | 5.5-11   | 82.0 (19.0)               | +4.0 (15.9)                             | +6.2 (15.5)*                            | +6.8 (15.6)*                             | +9.2 (13.6)*                             |
| FACT-Lym TS  | 6.5-11.2 | 121.2 (24.0)              | +6.4 (19.1)                             | +8.6 (20.3)*                            | +9.6 (17.9)*                             | +13.1 (16.1) <sup>†</sup>                |

+Indicates the means reported are positive changes from baseline.<sup>1-4</sup>

BL, baseline; CR, complete response; FACT-G TS, FACT-General Total Score; FACT-Lym, Functional Assessment of Cancer Therapy-Lymphoma; FACT-Lym S, FACT-Lymphoma Score; FACT-Lym TOI, FACT-Lymphoma Trial Outcome Index; FACT-Lym TS, FACT-Lymphoma Total Score; MCID, minimal clinically important difference; PR, partial response; SD, standard deviation.

\*Indicates that the clinical meaningful improvement in HRQoL is greater than MCID lower limit.

<sup>†</sup>Indicates that clinical meaningful improvement in HRQoL is greater than MCID upper limit.

<sup>‡</sup>All patients are clinical responders (CR/PR).

**Supplementary Table S4. SF-36 assessment scores (median) for responders**

|                      |      | Baseline, median (SD)     |                                    |                              | Change from BL<br>Month 3,<br>median (SD) | Change from BL<br>Month 6,<br>median (SD) | Change from BL<br>Month 12,<br>median (SD) | Change from BL<br>Month 18,<br>median (SD) |
|----------------------|------|---------------------------|------------------------------------|------------------------------|-------------------------------------------|-------------------------------------------|--------------------------------------------|--------------------------------------------|
| SF-36                | MCID | All patients<br>(N = 108) | Patients<br>With CR/PR<br>(n = 56) | Non-<br>responders<br>(n=52) | Patients With<br>CR/PR<br>(n = 42)        | Patients With<br>CR/PR<br>(n = 38)        | Patients With<br>CR/PR<br>(n = 31)         | Patients with<br>CR/PR<br>(n = 22)         |
| Bodily pain          | 3    | 74.0 (27.1)               | 74.0 (27.4)                        | 72.0 (26.9)                  | 0.0 (27.9)                                | 0.0 (30.8)                                | 0.0 (28.2)                                 | 0.0 (27.0)                                 |
| General health       | 2    | 47.0 (23.3)               | 47.0 (24.3)                        | 52.0 (22.2)                  | +13.5 (15.9)*                             | +10.0 (19.0)*                             | +5.0 (20.9)*                               | +6.0 (19.8)*                               |
| Mental health        | 3    | 75.0 (18.9)               | 75.0 (18.5)                        | 75.0 (19.2)                  | 0.0 (16.3)                                | 0.0 (14.8)                                | 0.0 (14.7)                                 | 0.0 (14.0)                                 |
| Physical functioning | 3    | 75.0 (26.7)               | 72.5 (28.0)                        | 75.0 (25.5)                  | 0.0 (23.8)                                | 0.0 (29.8)                                | 0.0 (28.2)                                 | +2.5 (32.9)                                |
| Role- emotional      | 4    | 91.7 (30.0)               | 91.7 (32.8)                        | 87.5 (26.8)                  | 0.0 (30.3)                                | 0.0 (29.4)                                | 0.0 (34.7)                                 | 0.0 (35.1)                                 |
| Role- physical       | 4    | 50.0 (32.0)               | 62.5 (34.0)                        | 50.0 (29.8)                  | 0.0 (37.5)                                | +6.3 (35.1)*                              | +6.3 (37.4)*                               | +6.3 (40.1)*                               |
| Social functioning   | 4    | 75.0 (27.8)               | 81.3 (26.8)                        | 75.0 (28.8)                  | 0.0 (27.8)                                | 0.0 (33.3)                                | +12.5 (29.0)*                              | +12.5 (29.8)*                              |
| Vitality             | 3    | 56.3 (23.6)               | 59.4 (24.0)                        | 50.0 (23.3)                  | +6.3 (23.4)*                              | +6.3 (24.1)*                              | +6.3 (23.9)*                               | +12.5 (24.1)*                              |
| Physical health TS   | 3    | 43.4 (9.2)                | 45.6 (9.9)                         | 43.1 (8.4)                   | +1.3 (9.1)                                | +1.8 (11.1)                               | 1.3 (10.5)                                 | +3.9 (10.6)*                               |
| Mental health TS     | 3    | 50.6 (10.5)               | 51.9 (10.0)                        | 49.7 (11.1)                  | +0.7 (9.3)                                | +1.9 (8.5)                                | 1.1 (9.6)                                  | +2.1 (9.9)                                 |

+Indicates the means reported are positive changes from baseline.<sup>1-4</sup>

BL, baseline; CR, complete response; MCID, minimal clinically important difference; PR, partial response; SD, standard deviation; SF-36, Short Form 36 Health Survey Version 2; TS, total score.

\*Indicates that the clinical meaningful improvement in HRQoL is greater than MCID.

**Supplementary Table S5. SF-36 assessment scores for all patients**

|                      |      | Baseline, mean (SD)    | Change from BL Month 3, mean (SD) | Change from BL Month 6, mean (SD)  | Change from BL Month 12, mean (SD) | Change from BL Month 18, mean (SD) |
|----------------------|------|------------------------|-----------------------------------|------------------------------------|------------------------------------|------------------------------------|
| SF-36                | MCID | All patients (N = 108) | All patients (n = 46)             | All patients (n = 35) <sup>‡</sup> | All patients (n = 30) <sup>‡</sup> | All patients (n = 21) <sup>‡</sup> |
| Bodily pain          | 3    | 69.4 (27.1)            | +0.3 (22.1)                       | +5.3 (31.5)*                       | +0.3 (27.2)                        | +3.5 (27.7)*                       |
| General health       | 2    | 52.1 (23.3)            | +5.2 (23.0)*                      | +9.9 (19.8)*                       | +7.0 (21.1)*                       | +11.0 (18.7)*                      |
| Mental health        | 3    | 72.8 (18.9)            | -1.4 (17.3)                       | +1.1 (14.6)                        | +2.3 (14.8)                        | +0.5 (14.0)                        |
| Physical functioning | 3    | 67.1 (26.7)            | -1.6 (24.3)                       | +4.3 (29.7)*                       | +5.3 (28.6)*                       | +10.0 (33.3)*                      |
| Role- emotional      | 4    | 75.2(30.0)             | -2.7 (28.0)                       | +8.3 (28.5)*                       | +5.8 (35.3)*                       | +5.0 (35.4)*                       |
| Role- physical       | 4    | 44.3 (9.2)             | +1.1 (34.3)                       | +8.5 (32.46)*                      | +8.5 (32.5)*                       | +9.9 (39.8)*                       |
| Social functioning   | 4    | 71.1 (27.8)            | -1.4 (28.9)                       | +8.6 (34.0)*                       | +12.1 (28.7)*                      | +19.6 (29.7)*                      |
| Vitality             | 3    | 54.3 (23.6)            | +0.7 (21.6)                       | +6.1 (24.6)*                       | +6.9 (23.9)*                       | +10.4 (23.5)*                      |
| Physical health TS   | 3    | 44.3 (9.17)            | +0.9 (9.4)                        | +2.8 (11.1)                        | +1.9 (10.5)                        | +4.3 (10.6)*                       |
| Mental health TS     | 3    | 48.1 (10.5)            | -0.9 (9.5)                        | +2.3 (8.7)                         | +2.9 (9.8)                         | +2.3 (9.8)                         |

+Indicates the means reported are positive changes from baseline.<sup>1-4</sup>

BL, baseline; CR, complete response; MCID, minimal clinically important difference; PR, partial response; SD, standard deviation; SF-36, Short Form 36 Health Survey Version 2; TS, total score.

\*Indicates that the clinical meaningful improvement in HRQoL is greater than MCID.

<sup>‡</sup>All patients are responders (CR/PR).

**REFERENCES**

1. Carter GC, Liepa AM, Zimmermann AH, Morschhauser F. Validation of the functional assessment of cancer therapy–lymphoma (FACT-LYM) in patients with relapsed/refractory mantle cell lymphoma *Blood*. 2008;112(11):2376.
2. Swigris JJ, Brown KK, Behr J, et al. The SF-36 and SGRQ: Validity and first look at minimum important differences in IPF. *Respir Med*. 2010;104(2):296-304.
3. Tam CS, Waller EK, Jaeger U, et al. Prolonged improvement in patient reported quality of life following tisagenlecleucel infusion in adult patients with relapsed/refractory diffuse large B-cell lymphoma: 19-month follow-up of the JULIET study. Presented at Transplantation and Cellular Therapy Meeting; February 20-24, 2019; Houston, TX. Poster 251.
4. Webster K, Cella D, Yost K. The functional assessment of chronic illness therapy (FACIT) measurement system: properties, applications, and interpretation. *Health Qual Life Outcomes*. 2003;1(1):79.
