# Supplementary material
Source: PubMed Central journal article supplement (PMC7042998)
Supplement: baADV2019001026-suppl2.pdf [file baADV2019001026-suppl2.pdf]

|                    |                                                                                                                                                                                                                                                                                                                                                                                                                                                                                                                                                                                                                                                                                                                                                                                                                                                                                                                                   |         |                   |          |             |                    |  |     |       |       |     |       |      |                                                                                                           |
|--------------------|-----------------------------------------------------------------------------------------------------------------------------------------------------------------------------------------------------------------------------------------------------------------------------------------------------------------------------------------------------------------------------------------------------------------------------------------------------------------------------------------------------------------------------------------------------------------------------------------------------------------------------------------------------------------------------------------------------------------------------------------------------------------------------------------------------------------------------------------------------------------------------------------------------------------------------------|---------|-------------------|----------|-------------|--------------------|--|-----|-------|-------|-----|-------|------|-----------------------------------------------------------------------------------------------------------|
| <b>STUDY</b>       | <table style="width: 100%; border-collapse: collapse;"> <tr> <td style="width: 50%; border-bottom: 1px solid black; text-align: center;"> _ _ _ _ </td> <td style="width: 50%; border-bottom: 1px solid black; text-align: center;"> _ _ _ _ _ _ _ _ _ </td> </tr> <tr> <td style="text-align: center;">Site No.</td> <td style="text-align: center;">Subject No.</td> </tr> <tr> <td colspan="2" style="border-bottom: 1px solid black; text-align: center;">Date of Assessment</td> </tr> <tr> <td style="width: 33%; border-bottom: 1px solid black; text-align: center;"> _ _ </td> <td style="width: 33%; border-bottom: 1px solid black; text-align: center;"> _ _ _ </td> <td style="width: 33%; border-bottom: 1px solid black; text-align: center;"> _ _ _ </td> </tr> <tr> <td style="text-align: center;">day</td> <td style="text-align: center;">month</td> <td style="text-align: center;">year</td> </tr> </table> | _ _ _ _ | _ _ _ _ _ _ _ _ _ | Site No. | Subject No. | Date of Assessment |  | _ _ | _ _ _ | _ _ _ | day | month | year | <div style="text-align: center; padding: 10px;">Visit Name</div> <hr style="border: 0.5px solid black;"/> |
| _ _ _ _            | _ _ _ _ _ _ _ _ _                                                                                                                                                                                                                                                                                                                                                                                                                                                                                                                                                                                                                                                                                                                                                                                                                                                                                                                 |         |                   |          |             |                    |  |     |       |       |     |       |      |                                                                                                           |
| Site No.           | Subject No.                                                                                                                                                                                                                                                                                                                                                                                                                                                                                                                                                                                                                                                                                                                                                                                                                                                                                                                       |         |                   |          |             |                    |  |     |       |       |     |       |      |                                                                                                           |
| Date of Assessment |                                                                                                                                                                                                                                                                                                                                                                                                                                                                                                                                                                                                                                                                                                                                                                                                                                                                                                                                   |         |                   |          |             |                    |  |     |       |       |     |       |      |                                                                                                           |
| _ _                | _ _ _                                                                                                                                                                                                                                                                                                                                                                                                                                                                                                                                                                                                                                                                                                                                                                                                                                                                                                                             | _ _ _   |                   |          |             |                    |  |     |       |       |     |       |      |                                                                                                           |
| day                | month                                                                                                                                                                                                                                                                                                                                                                                                                                                                                                                                                                                                                                                                                                                                                                                                                                                                                                                             | year    |                   |          |             |                    |  |     |       |       |     |       |      |                                                                                                           |

**FACT-Lym (Version 4)**

Below is a list of statements that other people with your illness have said are important. **Please circle or mark one number per line to indicate your response as it applies to the past 7 days.**

| <u>PHYSICAL WELL-BEING</u>                                                              | Not<br>at all | A little<br>bit | Some-<br>what | Quite<br>a bit | Very<br>much |
|-----------------------------------------------------------------------------------------|---------------|-----------------|---------------|----------------|--------------|
| 1. I have a lack of energy .....                                                        | 0             | 1               | 2             | 3              | 4            |
| 2. I have nausea .....                                                                  | 0             | 1               | 2             | 3              | 4            |
| 3. Because of my physical condition, I have trouble meeting the needs of my family..... | 0             | 1               | 2             | 3              | 4            |
| 4. I have pain .....                                                                    | 0             | 1               | 2             | 3              | 4            |
| 5. I am bothered by side effects of treatment.....                                      | 0             | 1               | 2             | 3              | 4            |
| 6. I feel ill .....                                                                     | 0             | 1               | 2             | 3              | 4            |
| 7. I am forced to spend time in bed .....                                               | 0             | 1               | 2             | 3              | 4            |

|               |                                                                                                                                                                                                                                                                                                                                                                                                                                       |               |                         |          |             |                                                                                                                                         |
|---------------|---------------------------------------------------------------------------------------------------------------------------------------------------------------------------------------------------------------------------------------------------------------------------------------------------------------------------------------------------------------------------------------------------------------------------------------|---------------|-------------------------|----------|-------------|-----------------------------------------------------------------------------------------------------------------------------------------|
| <b>STUDY</b>  | <table style="width: 100%; border-collapse: collapse;"> <tr> <td style="width: 50%; border-bottom: 1px solid black; text-align: center;"> _ _ _ _ _ _ _ </td> <td style="width: 50%; border-bottom: 1px solid black; text-align: center;"> _ _ _ _ _ _ _ _ _ _ _ _ </td> </tr> <tr> <td style="text-align: center; font-size: small;">Site No.</td> <td style="text-align: center; font-size: small;">Subject No.</td> </tr> </table> | _ _ _ _ _ _ _ | _ _ _ _ _ _ _ _ _ _ _ _ | Site No. | Subject No. | <p style="text-align: center; font-size: large;">Visit Name</p> <hr style="border: 0; border-top: 1px solid black; margin-top: 10px;"/> |
| _ _ _ _ _ _ _ | _ _ _ _ _ _ _ _ _ _ _ _                                                                                                                                                                                                                                                                                                                                                                                                               |               |                         |          |             |                                                                                                                                         |
| Site No.      | Subject No.                                                                                                                                                                                                                                                                                                                                                                                                                           |               |                         |          |             |                                                                                                                                         |

**Please circle or mark one number per line to indicate your response as it applies to the past 7 days.**

| <b><u>SOCIAL/FAMILY WELL-BEING</u></b>                                                                                                                                                                          | Not<br>at all | A little<br>bit | Some-<br>what | Quite<br>a bit | Very<br>much |
|-----------------------------------------------------------------------------------------------------------------------------------------------------------------------------------------------------------------|---------------|-----------------|---------------|----------------|--------------|
| 8. I feel close to my friends.....                                                                                                                                                                              | 0             | 1               | 2             | 3              | 4            |
| 9. I get emotional support from my family .....                                                                                                                                                                 | 0             | 1               | 2             | 3              | 4            |
| 10. I get support from my friends.....                                                                                                                                                                          | 0             | 1               | 2             | 3              | 4            |
| 11. My family has accepted my illness .....                                                                                                                                                                     | 0             | 1               | 2             | 3              | 4            |
| 12. I am satisfied with family communication about my illness.....                                                                                                                                              | 0             | 1               | 2             | 3              | 4            |
| 13. I feel close to my partner (or the person who is my main support).....                                                                                                                                      | 0             | 1               | 2             | 3              | 4            |
| 14. <i>Regardless of your current level of sexual activity, please answer the following question. If you prefer not to answer it, please mark this box <input type="checkbox"/> and go to the next section.</i> |               |                 |               |                |              |
| 15. I am satisfied with my sex life.....                                                                                                                                                                        | 0             | 1               | 2             | 3              | 4            |

|              |                                                                                                                                                                                                                                                                                                                                                                                                                           |         |                   |          |             |                                                                                                                                         |
|--------------|---------------------------------------------------------------------------------------------------------------------------------------------------------------------------------------------------------------------------------------------------------------------------------------------------------------------------------------------------------------------------------------------------------------------------|---------|-------------------|----------|-------------|-----------------------------------------------------------------------------------------------------------------------------------------|
| <b>STUDY</b> | <table style="width: 100%; border-collapse: collapse;"> <tr> <td style="width: 50%; border-bottom: 1px solid black; text-align: center;"> _ _ _ _ </td> <td style="width: 50%; border-bottom: 1px solid black; text-align: center;"> _ _ _ _ _ _ _ _ _ </td> </tr> <tr> <td style="text-align: center; font-size: small;">Site No.</td> <td style="text-align: center; font-size: small;">Subject No.</td> </tr> </table> | _ _ _ _ | _ _ _ _ _ _ _ _ _ | Site No. | Subject No. | <p style="text-align: center; font-size: large;">Visit Name</p> <hr style="border: 0; border-top: 1px solid black; margin-top: 10px;"/> |
| _ _ _ _      | _ _ _ _ _ _ _ _ _                                                                                                                                                                                                                                                                                                                                                                                                         |         |                   |          |             |                                                                                                                                         |
| Site No.     | Subject No.                                                                                                                                                                                                                                                                                                                                                                                                               |         |                   |          |             |                                                                                                                                         |

**Please circle or mark one number per line to indicate your response as it applies to the past 7 days.**

| <b><u>EMOTIONAL WELL-BEING</u></b>                              | Not<br>at all | A little<br>bit | Some-<br>what | Quite<br>a bit | Very<br>much |
|-----------------------------------------------------------------|---------------|-----------------|---------------|----------------|--------------|
| 16. I feel sad.....                                             | 0             | 1               | 2             | 3              | 4            |
| 17. I am satisfied with how I am coping with<br>my illness..... | 0             | 1               | 2             | 3              | 4            |
| 18. I am losing hope in the fight against my illness.....       | 0             | 1               | 2             | 3              | 4            |
| 19. I feel nervous.....                                         | 0             | 1               | 2             | 3              | 4            |
| 20. I worry about dying.....                                    | 0             | 1               | 2             | 3              | 4            |
| 21. I worry that my condition will get worse.....               | 0             | 1               | 2             | 3              | 4            |
| <br>                                                            |               |                 |               |                |              |
| <b><u>FUNCTIONAL WELL-BEING</u></b>                             | Not<br>at all | A little<br>bit | Some-<br>what | Quite<br>a bit | Very<br>much |
| 22. I am able to work (include work at home).....               | 0             | 1               | 2             | 3              | 4            |
| 23. My work (include work at home) is fulfilling.....           | 0             | 1               | 2             | 3              | 4            |
| 24. I am able to enjoy life.....                                | 0             | 1               | 2             | 3              | 4            |
| 25. I have accepted my illness.....                             | 0             | 1               | 2             | 3              | 4            |
| 26. I am sleeping well.....                                     | 0             | 1               | 2             | 3              | 4            |
| 27. I am enjoying the things I usually do for fun.....          | 0             | 1               | 2             | 3              | 4            |
| 28. I am content with the quality of my life right now....      | 0             | 1               | 2             | 3              | 4            |

|              |                                                                                                                                                                                                                                                                                                                                                                                                                           |         |                   |          |             |                                                                                                                                         |
|--------------|---------------------------------------------------------------------------------------------------------------------------------------------------------------------------------------------------------------------------------------------------------------------------------------------------------------------------------------------------------------------------------------------------------------------------|---------|-------------------|----------|-------------|-----------------------------------------------------------------------------------------------------------------------------------------|
| <b>STUDY</b> | <table style="width: 100%; border-collapse: collapse;"> <tr> <td style="width: 50%; border-bottom: 1px solid black; text-align: center;"> _ _ _ _ </td> <td style="width: 50%; border-bottom: 1px solid black; text-align: center;"> _ _ _ _ _ _ _ _ _ </td> </tr> <tr> <td style="text-align: center; font-size: small;">Site No.</td> <td style="text-align: center; font-size: small;">Subject No.</td> </tr> </table> | _ _ _ _ | _ _ _ _ _ _ _ _ _ | Site No. | Subject No. | <p style="text-align: center; font-size: large;">Visit Name</p> <hr style="border: 0; border-top: 1px solid black; margin-top: 10px;"/> |
| _ _ _ _      | _ _ _ _ _ _ _ _ _                                                                                                                                                                                                                                                                                                                                                                                                         |         |                   |          |             |                                                                                                                                         |
| Site No.     | Subject No.                                                                                                                                                                                                                                                                                                                                                                                                               |         |                   |          |             |                                                                                                                                         |

**Please circle or mark one number per line to indicate your response as it applies to the past 7 days.**

| <b>ADDITIONAL CONCERNS</b>                                                                              | Not<br>at all | A little<br>bit | Some-<br>what | Quite<br>a bit | Very<br>much |
|---------------------------------------------------------------------------------------------------------|---------------|-----------------|---------------|----------------|--------------|
| 29. I have certain parts of my body where I experience pain .....                                       | 0             | 1               | 2             | 3              | 4            |
| 30. I am bothered by lumps or swelling in certain parts of my body (e.g., neck, armpits, or groin)..... | 0             | 1               | 2             | 3              | 4            |
| 31. I am bothered by fevers (episodes of high body temperature) .....                                   | 0             | 1               | 2             | 3              | 4            |
| 32. I have night sweats .....                                                                           | 0             | 1               | 2             | 3              | 4            |
| 33. I am bothered by itching .....                                                                      | 0             | 1               | 2             | 3              | 4            |
| 34. I have trouble sleeping at night .....                                                              | 0             | 1               | 2             | 3              | 4            |
| 35. I get tired easily.....                                                                             | 0             | 1               | 2             | 3              | 4            |
| 36. I am losing weight.....                                                                             | 0             | 1               | 2             | 3              | 4            |

|              |                                                                                                                                                                                                                                                                                                                                                                                                                           |         |                   |          |             |                                                                                                                                         |
|--------------|---------------------------------------------------------------------------------------------------------------------------------------------------------------------------------------------------------------------------------------------------------------------------------------------------------------------------------------------------------------------------------------------------------------------------|---------|-------------------|----------|-------------|-----------------------------------------------------------------------------------------------------------------------------------------|
| <b>STUDY</b> | <table style="width: 100%; border-collapse: collapse;"> <tr> <td style="width: 50%; border-bottom: 1px solid black; text-align: center;"> _ _ _ _ </td> <td style="width: 50%; border-bottom: 1px solid black; text-align: center;"> _ _ _ _ _ _ _ _ _ </td> </tr> <tr> <td style="text-align: center; font-size: small;">Site No.</td> <td style="text-align: center; font-size: small;">Subject No.</td> </tr> </table> | _ _ _ _ | _ _ _ _ _ _ _ _ _ | Site No. | Subject No. | <p style="text-align: center; font-size: large;">Visit Name</p> <hr style="border: 0; border-top: 1px solid black; margin-top: 10px;"/> |
| _ _ _ _      | _ _ _ _ _ _ _ _ _                                                                                                                                                                                                                                                                                                                                                                                                         |         |                   |          |             |                                                                                                                                         |
| Site No.     | Subject No.                                                                                                                                                                                                                                                                                                                                                                                                               |         |                   |          |             |                                                                                                                                         |

**Please circle or mark one number per line to indicate your response as it applies to the past 7 days.**

| <b>ADDITIONAL CONCERNS</b>                                                    | Not<br>at all | A little<br>bit | Some-<br>what | Quite<br>a bit | Very<br>much |
|-------------------------------------------------------------------------------|---------------|-----------------|---------------|----------------|--------------|
| 37. I have a loss of appetite.....                                            | 0             | 1               | 2             | 3              | 4            |
| 38. I have trouble concentrating .....                                        | 0             | 1               | 2             | 3              | 4            |
| 39. I worry about getting infections.....                                     | 0             | 1               | 2             | 3              | 4            |
| 40. I worry that I might get new symptoms of<br>my illness.....               | 0             | 1               | 2             | 3              | 4            |
| 41. I feel isolated from others because of my<br>illness or treatment .....   | 0             | 1               | 2             | 3              | 4            |
| 42. I have emotional ups and downs.....                                       | 0             | 1               | 2             | 3              | 4            |
| 43. Because of my illness, I have difficulty planning<br>for the future ..... | 0             | 1               | 2             | 3              | 4            |
