# Supplementary material
Source: PubMed Central journal article supplement (PMC7042998)
Supplement: baADV2019001026-suppl3.pdf [file baADV2019001026-suppl3.pdf]

|                                       |                                                                                                                                                                                                                                                                                                                                                                                                                                                                                                                                                                                          |                                                   |
|---------------------------------------|------------------------------------------------------------------------------------------------------------------------------------------------------------------------------------------------------------------------------------------------------------------------------------------------------------------------------------------------------------------------------------------------------------------------------------------------------------------------------------------------------------------------------------------------------------------------------------------|---------------------------------------------------|
| <b>PROTOCOL NAME OR NO TRIAL CODE</b> | <b>ID</b><br>Center No. <input type="text"/> <input type="text"/> <input type="text"/> <input type="text"/> <input type="text"/> <input type="text"/><br>Subject No. <input type="text"/> <input type="text"/> <input type="text"/> <input type="text"/> <input type="text"/> <input type="text"/><br>Subject's initials <input type="text"/> <input type="text"/> <input type="text"/> <input type="text"/><br>1. 2. fam.<br>Visit Date <input type="text"/> <input type="text"/> <input type="text"/> <input type="text"/> <input type="text"/> <input type="text"/><br>day month year | Visit # <input style="width: 50px;" type="text"/> |
|---------------------------------------|------------------------------------------------------------------------------------------------------------------------------------------------------------------------------------------------------------------------------------------------------------------------------------------------------------------------------------------------------------------------------------------------------------------------------------------------------------------------------------------------------------------------------------------------------------------------------------------|---------------------------------------------------|

## Your Health and Well-Being

**This survey asks for your views about your health. This information will help keep track of how you feel and how well you are able to do your usual activities. *Thank you for completing this survey!***

**For each of the following questions, please mark an  in the one box that best describes your answer.**

**WCMC IRB**  
 Approval Date: 10-11-2015  
 Expiration Date: 08-23-2016

**1. In general, would you say your health is:**

|                            |                            |                            |                            |                            |
|----------------------------|----------------------------|----------------------------|----------------------------|----------------------------|
| Excellent                  | Very good                  | Good                       | Fair                       | Poor                       |
| ▼                          | ▼                          | ▼                          | ▼                          | ▼                          |
| <input type="checkbox"/> 1 | <input type="checkbox"/> 2 | <input type="checkbox"/> 3 | <input type="checkbox"/> 4 | <input type="checkbox"/> 5 |

**2. Compared to one year ago, how would you rate your health in general now?**

|                                         |                                                |                                      |                                               |                                        |
|-----------------------------------------|------------------------------------------------|--------------------------------------|-----------------------------------------------|----------------------------------------|
| Much better<br>now than one<br>year ago | Somewhat<br>better<br>now than one<br>year ago | About the<br>same as<br>one year ago | Somewhat<br>worse<br>now than one<br>year ago | Much worse<br>now than one<br>year ago |
| ▼                                       | ▼                                              | ▼                                    | ▼                                             | ▼                                      |
| <input type="checkbox"/> 1              | <input type="checkbox"/> 2                     | <input type="checkbox"/> 3           | <input type="checkbox"/> 4                    | <input type="checkbox"/> 5             |

|                                       |                                                                                                                                                                                                                                                                                                                                                                                                                                                                                                                                                                                                                                                                                          |               |
|---------------------------------------|------------------------------------------------------------------------------------------------------------------------------------------------------------------------------------------------------------------------------------------------------------------------------------------------------------------------------------------------------------------------------------------------------------------------------------------------------------------------------------------------------------------------------------------------------------------------------------------------------------------------------------------------------------------------------------------|---------------|
| <b>PROTOCOL NAME OR NO TRIAL CODE</b> | <b>ID</b><br><div style="display: flex; justify-content: space-around; margin-top: 5px;"> <div style="border: 1px solid black; width: 40px; height: 15px; margin: 0 auto;"></div> <div style="border: 1px solid black; width: 40px; height: 15px; margin: 0 auto;"></div> </div> <p style="text-align: center; margin: 0;">Center No.      Subject No.</p> <p style="margin: 0;">Subject's initials    <span style="border: 1px solid black; width: 20px; height: 15px; display: inline-block; margin-right: 5px;"></span> <span style="border: 1px solid black; width: 20px; height: 15px; display: inline-block;"></span></p> <p style="text-align: center; margin: 0;">1. 2. fam.</p> | Visit # _____ |
|---------------------------------------|------------------------------------------------------------------------------------------------------------------------------------------------------------------------------------------------------------------------------------------------------------------------------------------------------------------------------------------------------------------------------------------------------------------------------------------------------------------------------------------------------------------------------------------------------------------------------------------------------------------------------------------------------------------------------------------|---------------|

**3. The following questions are about activities you might do during a typical day. Does your health now limit you in these activities? If so, how much?**

|                          |                             |                              |
|--------------------------|-----------------------------|------------------------------|
| Yes,<br>limited<br>a lot | Yes,<br>limited<br>a little | No, not<br>limited<br>at all |
| ▼                        | ▼                           | ▼                            |

- a Vigorous activities, such as running, lifting heavy objects, participating in strenuous sports .....  1.....  2 .....  3
- b Moderate activities, such as moving a table, pushing a vacuum cleaner, bowling, or playing golf .....  1.....  2 .....  3
- c Lifting or carrying groceries .....  1.....  2 .....  3
- d Climbing several flights of stairs .....  1.....  2 .....  3
- e Climbing one flight of stairs .....  1.....  2 .....  3
- f Bending, kneeling, or stooping .....  1.....  2 .....  3
- g Walking more than a mile .....  1.....  2 .....  3
- h Walking several hundred yards .....  1.....  2 .....  3
- i Walking one hundred yards .....  1.....  2 .....  3
- j Bathing or dressing yourself .....  1.....  2 .....  3







|                                       |                                                                                                                                                                                                                                                                                                                                                                                                                                                                                                                                                                                                                                                                                                                       |               |
|---------------------------------------|-----------------------------------------------------------------------------------------------------------------------------------------------------------------------------------------------------------------------------------------------------------------------------------------------------------------------------------------------------------------------------------------------------------------------------------------------------------------------------------------------------------------------------------------------------------------------------------------------------------------------------------------------------------------------------------------------------------------------|---------------|
| <b>PROTOCOL NAME OR NO TRIAL CODE</b> | <b>ID</b><br><div style="display: flex; justify-content: space-around; margin-bottom: 5px;"> <div style="border: 1px solid black; width: 40px; height: 15px; margin: 0 auto;"></div> <div style="border: 1px solid black; width: 40px; height: 15px; margin: 0 auto;"></div> </div> <p style="text-align: center; margin: 0;">Center No.      Subject No.</p> <div style="display: flex; justify-content: space-around; margin-bottom: 5px;"> <div style="border: 1px solid black; width: 30px; height: 15px; margin: 0 auto;"></div> <div style="border: 1px solid black; width: 30px; height: 15px; margin: 0 auto;"></div> </div> <p style="text-align: center; margin: 0;">Subject's initials      1. 2. fam.</p> | Visit # _____ |
|---------------------------------------|-----------------------------------------------------------------------------------------------------------------------------------------------------------------------------------------------------------------------------------------------------------------------------------------------------------------------------------------------------------------------------------------------------------------------------------------------------------------------------------------------------------------------------------------------------------------------------------------------------------------------------------------------------------------------------------------------------------------------|---------------|

**10. During the past 4 weeks, how much of the time has your physical health or emotional problems interfered with your social activities (like visiting with friends, relatives, etc.)?**

|                            |                            |                            |                            |                            |
|----------------------------|----------------------------|----------------------------|----------------------------|----------------------------|
| All of<br>the time         | Most of<br>the time        | Some of<br>the time        | A little of<br>the time    | None of<br>the time        |
| ▼                          | ▼                          | ▼                          | ▼                          | ▼                          |
| <input type="checkbox"/> 1 | <input type="checkbox"/> 2 | <input type="checkbox"/> 3 | <input type="checkbox"/> 4 | <input type="checkbox"/> 5 |

**11. How TRUE or FALSE is each of the following statements for you?**

|                                                                                                                                                                                                                             |                |               |                 |                     |
|-----------------------------------------------------------------------------------------------------------------------------------------------------------------------------------------------------------------------------|----------------|---------------|-----------------|---------------------|
| Definitely<br>true                                                                                                                                                                                                          | Mostly<br>true | Don't<br>know | Mostly<br>false | Definitely<br>false |
| ▼                                                                                                                                                                                                                           | ▼              | ▼             | ▼               | ▼                   |
| a I seem to get sick a little easier than other people ..... <input type="checkbox"/> 1 ..... <input type="checkbox"/> 2 ..... <input type="checkbox"/> 3 ..... <input type="checkbox"/> 4 ..... <input type="checkbox"/> 5 |                |               |                 |                     |
| b I am as healthy as anybody I know ..... <input type="checkbox"/> 1 ..... <input type="checkbox"/> 2 ..... <input type="checkbox"/> 3 ..... <input type="checkbox"/> 4 ..... <input type="checkbox"/> 5                    |                |               |                 |                     |
| c I expect my health to get worse ..... <input type="checkbox"/> 1 ..... <input type="checkbox"/> 2 ..... <input type="checkbox"/> 3 ..... <input type="checkbox"/> 4 ..... <input type="checkbox"/> 5                      |                |               |                 |                     |
| d My health is excellent ..... <input type="checkbox"/> 1 ..... <input type="checkbox"/> 2 ..... <input type="checkbox"/> 3 ..... <input type="checkbox"/> 4 ..... <input type="checkbox"/> 5                               |                |               |                 |                     |

***Thank you for completing these questions!***
